# Supplementary material for: Age-Associated Neurological Complications of COVID-19: A Systematic Review and Meta-Analysis
Source: PubMed Central journal article supplement (PMC8366271; doi:10.3389/fnagi.2021.653694), 2021-08-02
Supplement: Table_3.pdf [file Table_3.pdf]

**Supplementary Table 3.** Large study patient reports of COVID-19 from which individual patient data could not be collected (n = 1689).

| First Author [reference] | Neurological Diagnosis                           | Age (years)                                                                                                                                                                                           | Sex                                                                                                                                                                                                    | COVID-19 severity                                         | Comorbidities                                                                                                                                                                                                                                                                                                                                                                                                                                                 | n   |
|--------------------------|--------------------------------------------------|-------------------------------------------------------------------------------------------------------------------------------------------------------------------------------------------------------|--------------------------------------------------------------------------------------------------------------------------------------------------------------------------------------------------------|-----------------------------------------------------------|---------------------------------------------------------------------------------------------------------------------------------------------------------------------------------------------------------------------------------------------------------------------------------------------------------------------------------------------------------------------------------------------------------------------------------------------------------------|-----|
| <b>Cagnazzo</b> [282]    | Stroke                                           | 71 [59–79]<br>Median [IQR]                                                                                                                                                                            | 61 Male<br>30 Female<br>2 non-disclosed                                                                                                                                                                | Asymptomatic (n=32)<br>Moderate-severe (n=61)             | Hypertension (n=62)<br>Diabetes (n=20)<br>Hypercholesterolemia (n=28)<br>Smoking (n=21)<br>Kidney disease (n=4)                                                                                                                                                                                                                                                                                                                                               | 93  |
| <b>Ji</b> [283]          | Stroke                                           | 66.4 ± 12.1<br><br><b>&lt;60 years</b><br>51.9 ± 5.4<br><br><b>≥ 60 years</b><br>72.5 ± 8.3<br><br><b>Non-severe COVID-19</b><br>62.4 ± 12.0<br><br><b>Severe COVID-19</b><br>74.3 ± 8.0<br>Mean ± SD | <b>&lt;60 years</b><br>3 Male<br>5 Female<br><br><b>≥ 60 years</b><br>12 Male<br>7 Female<br><br><b>Non-severe COVID-19</b><br>7 Male<br>11 Female<br><br><b>Severe COVID-19</b><br>3 Male<br>6 Female | Non-severe (n=18)<br>Severe (n=9)                         | <b>&lt;60 years</b><br>Hypertension (n=3)<br>Diabetes (n=2)<br>History of smoking (n=1)<br><br><b>≥ 60 years</b><br>Hypertension (n=10)<br>Diabetes (n=5)<br>Cardiovascular disease (n=2)<br>History of smoking (n=7)<br><br><b>Non-severe COVID-19</b><br>Hypertension (n=5)<br>Diabetes (n=5)<br>History of smoking (n=6)<br><br><b>Severe COVID-19</b><br>Hypertension (n=8)<br>Diabetes (n=2)<br>Cardiovascular disease (n=2)<br>History of smoking (n=2) | 27  |
| <b>Kihira</b> [284]      | Stroke                                           | 65.6 ± 13.2<br>Mean ± SD                                                                                                                                                                              | 77 Male<br>49 Female                                                                                                                                                                                   | Data not provided                                         | Cardiovascular risk factors* (n=218)<br>Atrial Fibrillation (n=19)<br>Pulmonary diseases^ (n=41)<br>Smoking (n=41)                                                                                                                                                                                                                                                                                                                                            | 126 |
| <b>Lechien</b> [285]     | Smell disorder (n=357)<br>Taste disorder (n=342) | 36.9 ± 11.4 [19-77]<br>Mean ± SD [range]                                                                                                                                                              | 154 Male<br>263 Female                                                                                                                                                                                 | Mild-moderate                                             | Smoking (n=56)<br>Allergies (n=85)                                                                                                                                                                                                                                                                                                                                                                                                                            | 417 |
| <b>Mowla</b> [286]       | Cerebral venous sinus thrombosis                 | 50.9 ± 11.2                                                                                                                                                                                           | 5 Male<br>8 Female                                                                                                                                                                                     | Asymptomatic (n=1)<br>Mild-moderate (n=9)<br>Severe (n=1) | Not provided                                                                                                                                                                                                                                                                                                                                                                                                                                                  | 13  |

|                                     |                                                                                                    |                                                                 |                                       |                                                                                                                                                                                                         |                                                                                                                                                                                                       |     |
|-------------------------------------|----------------------------------------------------------------------------------------------------|-----------------------------------------------------------------|---------------------------------------|---------------------------------------------------------------------------------------------------------------------------------------------------------------------------------------------------------|-------------------------------------------------------------------------------------------------------------------------------------------------------------------------------------------------------|-----|
| <b>Porta-Etessam</b><br>[287]       | Headache                                                                                           | 43.4 ± 11.4<br>mean ± SD                                        | 21 Male<br>91 Female                  | Mild-moderate                                                                                                                                                                                           | Hypertension (n=5)<br>Dyslipidemia (n=15)                                                                                                                                                             | 112 |
| <b>Qiu</b><br>[288]                 | <b>Children</b><br>Smell disorder (n=3)<br>Smell & taste disorder<br>(n=7)                         | <b>Children</b><br>16.6 ± 0.7<br>[16.3-17]                      | <b>Children</b><br>6 Male<br>4 Female | <b>Children</b><br>Mild (n=6)<br>Moderate (n=4)                                                                                                                                                         | Not provided                                                                                                                                                                                          | 171 |
|                                     | <b>Adults</b><br>Smell disorder (n=61)<br>Taste disorder (n=7)<br>Smell & taste disorder<br>(n=93) | <b>Adults</b><br>38.8 ± 17.6<br>[23-53]<br>Median ± SD<br>[IQR] | <b>Adults</b><br>92 Male<br>69 Female | <b>Adults</b><br>Mild (n=76)<br>Moderate (n=40)<br>Severe (n=33)<br>Critical (n=10)                                                                                                                     |                                                                                                                                                                                                       |     |
| <b>Scullen<sup>a</sup></b><br>[200] | Encephalopathy (n=20)<br>Acute necrotizing<br>Encephalopathy (n=2)<br>Vasculopathy (n=5)           | 59.8 [35-91]<br>Mean [range]                                    | 14 Male<br>13 Female                  | Critical                                                                                                                                                                                                | Hypertension (n=17)<br>Diabetes (n=14)<br>Obesity (n=7)<br>Kidney disease (n=6)<br>Cardiovascular disease (n=7)                                                                                       | 27  |
| <b>Trifan<sup>b</sup></b><br>[80]   | Stroke                                                                                             | 64 [18]                                                         | 44 Male<br>39 Female                  | <b>Male</b><br>Asymptomatic (n=3)<br>Mild-moderate (n=9)<br>Severe (n=32)<br>Critical (n=27)                                                                                                            | <b>Male</b><br>Cardiovascular risk factors*<br>(n=83)<br>Pulmonary Diseases^ (n=17)<br>Atrial fibrillation (n=5)<br>Kidney disease (n=10)<br>Chronic Obstructive Pulmonary<br>Disease or Asthma (n=2) | 83  |
|                                     |                                                                                                    | <b>Male</b><br>63 [17]                                          |                                       | <b>Female</b><br>Asymptomatic (n=3)<br>Mild-moderate<br>(n=17)<br>Severe (n=19)<br>Critical (n=16)                                                                                                      |                                                                                                                                                                                                       |     |
|                                     |                                                                                                    | <b>Female</b><br>68 [17]<br>Median [IQR]                        |                                       | <b>Female</b><br>Cardiovascular risk factors*<br>(n=59)<br>Pulmonary diseases^ (n=10)<br>Atrial fibrillation (n=3)<br>Kidney disease (n=12)<br>Chronic Obstructive Pulmonary<br>Disease or Asthma (n=2) |                                                                                                                                                                                                       |     |
| <b>Uginet</b><br>[289]              | Encephalopathy                                                                                     | 64.6 ± 12.1<br><br><b>Mild COVID-19</b><br>63.8 ± 15.0          | <b>Mild COVID-19</b><br>17 Male       | Mild (n=17)<br>Severe (n=14)                                                                                                                                                                            | <b>Mild COVID-19</b><br>Smoking (n=1)<br>Cardiovascular risk factors*<br>(n=12)                                                                                                                       | 31  |

|             |                                                  | Severe COVID-19<br>65.6 ± 7.8<br>Mean ± SD      | Severe COVID-19<br>12 Male<br>2 Female |                                                                                                                                                                                        | Chronic cardiac disease (n=4)<br>Pulmonary diseases^ (n=4)<br>Dementia (n=3)<br><br>Severe COVID-19<br>Smoking (n=2)<br>Cardiovascular risk factors*<br>(n=10)<br>Chronic cardiac disease (n=4)<br>Pulmonary diseases^ (n=3) |     |
|-------------|--------------------------------------------------|-------------------------------------------------|----------------------------------------|----------------------------------------------------------------------------------------------------------------------------------------------------------------------------------------|------------------------------------------------------------------------------------------------------------------------------------------------------------------------------------------------------------------------------|-----|
| Vaira [290] | Smell disorder (n=55)<br>Taste disorder (n=76)   | 49.6 ± 8.5<br>[43–55.2]<br>Mean ± SD<br>[IQR]   | 53 Male<br>53 Female                   | Moderate                                                                                                                                                                               | Not provided                                                                                                                                                                                                                 | 106 |
| Vaira [291] | Smell disorder (n=84)<br>Taste disorder (n=56)   | 51.2 ± 8.8<br>[46.7–58.0]<br>Mean ± SD<br>[IQR] | 68 Male<br>70 Female                   | Mild-moderate (n=106)<br>Severe-critical (n=32)                                                                                                                                        | Diabetes (n=15)<br>Obesity (n=40)<br>Cardiovascular disease (n=37)<br>Pulmonary diseases^ (n=21)                                                                                                                             | 138 |
| Vaira [292] | Smell disorder (n=225)<br>Taste disorder (n=234) | 48.5 ± 12.8<br>[23–88]<br>Mean ± SD<br>[range]  | 146 Male<br>199 Female                 | Asymptomatic (n=10)<br><br><b>Smell disorder</b><br>Mild (n=122),<br>Moderate (n=77)<br>Severe (n=36)<br><br><b>Taste disorder</b><br>Mild (n=118)<br>Moderate (n=82)<br>Severe (n=34) | Not provided                                                                                                                                                                                                                 | 345 |

<sup>a</sup>Data from three case reports given as example were included in the statistical analysis

<sup>b</sup>Data from ten case reports given as example were included in the statistical analysis

\*Cardiovascular risk factors: hypertension; diabetes, dyslipidemia, obstructive sleep apnea

^Pulmonary diseases: coronary artery disease or congestive heart failure

**Abbreviations:** Standard deviation (SD); Interquartile range (IQR)
